# Supplementary material for: Highly expressed placental miRNAs control key biological processes in human cancer cell lines
Source: PubMed Central journal article supplement (PMC5955126; doi:10.18632/oncotarget.25264), 2018-05-04
Supplement: oncotarget-09-23554-s001.pdf [file oncotarget-09-23554-s001.pdf]

## Highly expressed placental miRNAs control key biological processes in human cancer cell lines

### SUPPLEMENTARY MATERIALS

**Supplementary Table 1: The 30 most highly expressed miRNAs in normal human placenta samples of the third trimester of pregnancy**

| miRNAs          | 37 weeks* | 38 weeks* | 39 weeks* | 40 weeks* | Average** |
|-----------------|-----------|-----------|-----------|-----------|-----------|
| hsa-miR-451     | 15.554    | 15.489    | 15.080    | 15.650    | 15.443    |
| hsa-miR-923     | 15.745    | 15.218    | 15.650    | 14.990    | 15.401    |
| hsa-miR-517b    | 15.121    | 15.489    | 15.542    | 15.427    | 15.395    |
| hsa-miR-720     | 15.381    | 15.149    | 15.181    | 15.073    | 15.196    |
| hsa-miR-517a    | 14.888    | 15.542    | 15.039    | 15.190    | 15.165    |
| hsa-miR-23a     | 15.109    | 15.149    | 15.307    | 14.871    | 15.109    |
| hsa-miR-424     | 15.264    | 14.970    | 15.015    | 15.156    | 15.101    |
| hsa-miR-24      | 15.238    | 14.702    | 15.266    | 14.758    | 14.991    |
| hsa-miR-21      | 14.419    | 15.113    | 14.301    | 15.156    | 14.747    |
| hsa-miR-516b    | 14.691    | 14.388    | 14.970    | 14.464    | 14.628    |
| hsa-miR-1323    | 14.332    | 14.749    | 14.702    | 14.340    | 14.531    |
| hsa-miR-1274b   | 14.512    | 14.739    | 14.305    | 14.493    | 14.512    |
| hsa-miR-27a     | 14.492    | 14.332    | 14.558    | 14.465    | 14.462    |
| hsa-miR-515-5p  | 13.974    | 13.951    | 13.873    | 14.087    | 13.971    |
| hsa-miR-517c    | 13.540    | 14.030    | 13.507    | 14.219    | 13.824    |
| hsa-miR-519d    | 13.690    | 13.643    | 14.087    | 13.665    | 13.771    |
| hsa-miR-525-5p  | 13.825    | 13.974    | 13.715    | 13.390    | 13.726    |
| hsa-miR-515-3p  | 14.081    | 13.944    | 12.972    | 13.513    | 13.627    |
| hsa-miR-516a-5p | 13.837    | 13.209    | 13.837    | 13.401    | 13.571    |
| hsa-let-7a      | 12.999    | 13.757    | 13.744    | 13.728    | 13.557    |
| hsa-miR-22      | 13.743    | 13.619    | 13.797    | 12.974    | 13.533    |
| hsa-miR-23b     | 13.192    | 13.431    | 13.677    | 13.507    | 13.452    |
| hsa-miR-126     | 13.153    | 13.431    | 13.304    | 13.662    | 13.388    |
| hsa-miR-518e    | 13.366    | 13.259    | 13.629    | 13.208    | 13.365    |
| hsa-miR-29a     | 13.555    | 13.119    | 13.245    | 13.496    | 13.354    |
| hsa-miR-512-3p  | 13.447    | 12.900    | 13.544    | 13.430    | 13.330    |
| hsa-miR-130a    | 13.431    | 13.131    | 13.370    | 13.153    | 13.271    |
| hsa-miR-125b    | 12.899    | 13.300    | 13.743    | 13.056    | 13.249    |
| hsa-miR-30b     | 12.912    | 13.476    | 13.347    | 13.146    | 13.220    |
| hsa-miR-26a     | 13.321    | 13.366    | 12.917    | 13.274    | 13.220    |
| hsa-miR-1225-5p | 10.936    | 12.868    | 12.111    | 12.520    | 12.109    |

\*Log of the normalized average expression of the miRNAs in the two placenta samples for each gestational weeks used in the microarrays experiments.

\*\*Log of the normalized average expression of the miRNAs for all the placenta samples used in the microarrays experiments.

**Supplementary Table 2: Normalized expression of miR-451 and miR-720 in the 16 cancer cell lines, 20 commercial normal tissues samples and 19 normal placenta samples. See supplementary\_Table\_2**
